# Supplementary material for: Synergistic Hepatoprotective Effects of Mesenchymal Stem Cells and Platelet-Rich Plasma in a Rat Model of Bile Duct Ligation-Induced Liver Cirrhosis
Source: MDPI journal article supplement (doi:10.3390/cells13050404), 2024-02-26
Supplement: s1 [file s1]

## Supplementary files

### Supplementary Tables

**Table 1: Effect of different treatment protocols on the body weight of BDL rats at various time intervals.**

|         | Pre value  | 3 <sup>rd</sup> week      | 4 <sup>th</sup> week     | 5 <sup>th</sup> week      | 6 <sup>th</sup> week     |
|---------|------------|---------------------------|--------------------------|---------------------------|--------------------------|
| Group A | 225±9.34   | 268±7.78 <sup>ac*</sup>   | 266.6±5.46 <sup>a*</sup> | 272±8.23 <sup>a*</sup>    | 274±7.83 <sup>a*</sup>   |
| Group B | 246.4±9.34 | 219.4±7.78 <sup>bd</sup>  | 215.2±5.46 <sup>b</sup>  | 202.00±8.23 <sup>b*</sup> | 204.0±7.83 <sup>b*</sup> |
| Group C | 231.8±9.34 | 217.4±7.78 <sup>bc</sup>  | 217.8±5.46 <sup>b</sup>  | 234.2±8.23 <sup>ab</sup>  | 241.4±7.83 <sup>ac</sup> |
| Group D | 216.6±9.34 | 196±7.78 <sup>b</sup>     | 198.4±5.46 <sup>b</sup>  | 220.4±8.23 <sup>b</sup>   | 208.4±7.83 <sup>b</sup>  |
| Group E | 242.6±9.34 | 230.8±7.78 <sup>abc</sup> | 224±5.46 <sup>c</sup>    | 265.6±8.23 <sup>ac</sup>  | 255.8±7.83 <sup>ad</sup> |
| Group F | 235.8±9.34 | 239.2±7.78 <sup>cd</sup>  | 247±5.46 <sup>ac</sup>   | 229.2±8.23 <sup>bc</sup>  | 236.8±7.83 <sup>ac</sup> |
| Group G | 206.8±9.34 | 218.2±7.78 <sup>bd</sup>  | 205.8±5.46 <sup>b</sup>  | 242.8±8.23 <sup>ab</sup>  | 230.2±7.83 <sup>cd</sup> |
| Group H | 224.4±9.34 | 205±7.78 <sup>bd</sup>    | 214±5.46 <sup>b</sup>    | 224.8±8.23 <sup>b</sup>   | 254.8±7.83 <sup>ad</sup> |
| Group I | 226.4±9.34 | 207±7.78 <sup>bd</sup>    | 228±5.46 <sup>c</sup>    | 234.8±8.23 <sup>ab</sup>  | 249.4±7.83 <sup>ad</sup> |

Values are given as mean±SE for 5 rats in each interval in each group (n=20).

Each value not sharing a common letter superscript is significantly different (P<0.05).

\* Mean values differ significantly within the group (P<0.05).

**Table 2: Effect of different treatment protocols on the liver weight of BDL rats at various time intervals.**

|         | Pre value  | 3 <sup>rd</sup> week     | 4 <sup>th</sup> week     | 5 <sup>th</sup> week    | 6 <sup>th</sup> week    |
|---------|------------|--------------------------|--------------------------|-------------------------|-------------------------|
| Group A | 11.25±0.96 | 13.4±1.62 <sup>a</sup>   | 13.33±1.54 <sup>a</sup>  | 13.6±1.5 <sup>a</sup>   | 13.7±1.54               |
| Group B | 13.61±1.05 | 22.38±1.77 <sup>b*</sup> | 23.76±1.69 <sup>b</sup>  | 22.57±1.64 <sup>b</sup> | 20.57±1.68 <sup>*</sup> |
| Group C | 13.91±1.05 | 14.6±1.77                | 18.6±1.69 <sup>*</sup>   | 16.4±1.64               | 18.4±1.68               |
| Group D | 13±1.05    | 14.4±1.77                | 15±1.69 <sup>ac</sup>    | 15±1.64                 | 12.6±1.68               |
| Group E | 13.79±1.05 | 13.6±1.77 <sup>ac</sup>  | 20.4±1.69 <sup>*</sup>   | 15.4±1.64               | 20±1.68 <sup>*</sup>    |
| Group F | 14.15±1.05 | 20±1.77                  | 18±1.69                  | 16.6±1.64               | 20.6±1.68 <sup>*</sup>  |
| Group G | 12.41±1.05 | 18.8±1.77 <sup>*</sup>   | 16.8±1.69 <sup>ac*</sup> | 14.4±1.64               | 16±1.68                 |
| Group H | 13.46±1.05 | 18.8±1.77 <sup>*</sup>   | 17.2±1.69                | 15.6±1.64               | 17.6±1.68               |
| Group I | 14±1.05    | 15.4±1.77 <sup>ac</sup>  | 14.8±1.69                | 15±1.64                 | 14±1.68                 |

Values are given as mean±SE for 5 rats in each interval in each group (n=20).

Each value not sharing a common letter superscript is significantly different (P<0.05).

\* Mean values differ significantly within the group (P<0.05).

**Table 3: Effect of different treatment protocols on the serum glucose of BDL rats at various time intervals.**

|         | Pre value  | 3 <sup>rd</sup> week     | 4 <sup>th</sup> week      | 5 <sup>th</sup> week     | 6 <sup>th</sup> week    |
|---------|------------|--------------------------|---------------------------|--------------------------|-------------------------|
| Group A | 101.6±8.28 | 104.4±3.52 <sup>ac</sup> | 112±8.03 <sup>ac</sup>    | 129±2.66 <sup>a</sup>    | 124±4.64 <sup>a</sup>   |
| Group B | 120±8.28   | 90.0±3.52 <sup>ad</sup>  | 92±8.03 <sup>abc</sup>    | 78.2±2.66 <sup>bd</sup>  | 82.6±4.64 <sup>b</sup>  |
| Group C | 117.6±8.28 | 117.4±3.52 <sup>c</sup>  | 102.8±8.03 <sup>abc</sup> | 99±2.66 <sup>cef</sup>   | 87.6±4.64 <sup>b</sup>  |
| Group D | 101.6±8.28 | 43.6±3.52 <sup>b</sup>   | 75.6±8.03 <sup>ab</sup>   | 75.6±2.66 <sup>b</sup>   | 78.6±4.64 <sup>b</sup>  |
| Group E | 132.2±8.28 | 109±3.52 <sup>ce</sup>   | 69.4±8.03 <sup>b</sup>    | 88±2.66 <sup>bc</sup>    | 93.0±4.64 <sup>b</sup>  |
| Group F | 106.6±8.28 | 78.6±3.52 <sup>d</sup>   | 82.4±8.03 <sup>abc</sup>  | 90.4±2.66 <sup>cde</sup> | 93.4±4.64 <sup>b</sup>  |
| Group G | 106.2±8.28 | 114.2±3.52 <sup>ce</sup> | 116.2±8.03 <sup>c</sup>   | 103.4±2.66 <sup>ef</sup> | 101±4.64 <sup>bc</sup>  |
| Group H | 116±8.28   | 113.8±3.52 <sup>ce</sup> | 106.4±8.03 <sup>abc</sup> | 104.4±2.66 <sup>f</sup>  | 118.6±4.64 <sup>a</sup> |
| Group I | 115.4±8.28 | 99.6±3.52 <sup>ae</sup>  | 111.2±8.03 <sup>ac</sup>  | 116.6±2.66 <sup>af</sup> | 118.8±4.64 <sup>a</sup> |

Values are given as mean±SE for 5 rats in each interval in each group (n=20).

Each value not sharing a common letter superscript is significantly different (P<0.05).

\* Mean values differ significantly within the group (P<0.05).

**Table 4: Effect of different treatment protocols on the aspartate aminotransferase (AST) of BDL rats at various time intervals.**

|         | Pre value   | 3 <sup>rd</sup> week      | 4 <sup>th</sup> week      | 5 <sup>th</sup> week        | 6 <sup>th</sup> week        |
|---------|-------------|---------------------------|---------------------------|-----------------------------|-----------------------------|
| Group A | 156.79±3.57 | 156.97±9.8 <sup>a</sup>   | 158.89±9.8 <sup>a</sup>   | 156.31±17.25 <sup>a</sup>   | 157.76±15.56 <sup>a</sup>   |
| Group B | 158.05±3.57 | 268.82±9.8 <sup>b*</sup>  | 259.46±9.8 <sup>b*</sup>  | 400.87±17.25 <sup>b*</sup>  | 630.53±15.56 <sup>b*</sup>  |
| Group C | 155.94±3.57 | 197.83±9.8 <sup>ac*</sup> | 191.97±9.8 <sup>ac*</sup> | 294.77±17.25 <sup>c*</sup>  | 312.26±15.56 <sup>d*</sup>  |
| Group D | 157.91±3.57 | 197.47±9.8 <sup>cd*</sup> | 211.41±9.8 <sup>c*</sup>  | 345.66±17.25 <sup>bc*</sup> | 436.67±15.56 <sup>c*</sup>  |
| Group E | 149.44±3.57 | 218.97±9.8 <sup>c*</sup>  | 204.85±9.8 <sup>ac*</sup> | 336.62±17.25 <sup>bc*</sup> | 439.37±15.56 <sup>c*</sup>  |
| Group F | 152.86±3.57 | 211.13±9.8 <sup>c*</sup>  | 198.73±9.8 <sup>ac*</sup> | 266.31±17.25 <sup>cd*</sup> | 329.76±15.56 <sup>d*</sup>  |
| Group G | 151.71±3.57 | 188.58±9.8 <sup>ac*</sup> | 210.86±9.8 <sup>c*</sup>  | 217.66±17.25 <sup>ad*</sup> | 288.76±15.56 <sup>d*</sup>  |
| Group H | 148.83±3.57 | 177.44±9.8 <sup>ac</sup>  | 190.01±9.8 <sup>ac*</sup> | 206.04±17.25 <sup>ad*</sup> | 261.67±15.56 <sup>de*</sup> |
| Group I | 151.91±3.57 | 172.49±9.8 <sup>ac</sup>  | 182.27±9.8 <sup>ac</sup>  | 196.19±17.25 <sup>ad*</sup> | 227.51±15.56 <sup>ae</sup>  |

Values are given as mean±SE for 5 rats in each interval in each group (n=20).

Each value not sharing a common letter superscript is significantly different (P<0.05).

\* Mean values differ significantly within the group (P<0.05).

**Table 5: Effect of different treatment protocols on the alanine aminotransferase (ALT) of BDL rats at various time intervals.**

|         | Pre value  | 3 <sup>rd</sup> week       | 4 <sup>th</sup> week      | 5 <sup>th</sup> week       | 6 <sup>th</sup> week       |
|---------|------------|----------------------------|---------------------------|----------------------------|----------------------------|
| Group A | 36.49±0.74 | 39.35±0.73 <sup>a</sup>    | 40.90±1.17 <sup>a*</sup>  | 40.46±2.09 <sup>a</sup>    | 41.21±1.29 <sup>a*</sup>   |
| Group B | 38.57±0.74 | 55.56±0.73 <sup>b*</sup>   | 96.44±1.17 <sup>b*</sup>  | 121.41±2.09 <sup>b*</sup>  | 155.44±1.29 <sup>b*</sup>  |
| Group C | 40.08±0.74 | 49.29±0.73 <sup>cde*</sup> | 89.43±1.17 <sup>c*</sup>  | 97.64±2.09 <sup>cdf*</sup> | 130.52±1.29 <sup>df*</sup> |
| Group D | 39.10±0.74 | 52.26±0.73 <sup>bcd*</sup> | 90.97±1.17 <sup>bc*</sup> | 106.10±2.09 <sup>c*</sup>  | 140.66±1.29 <sup>c*</sup>  |
| Group E | 38.73±0.74 | 52.94±0.73 <sup>bd*</sup>  | 91.21±1.17 <sup>bc*</sup> | 103.70±2.09 <sup>cd*</sup> | 139.56±1.29 <sup>c*</sup>  |
| Group F | 38.94±0.74 | 50.51±0.73 <sup>de*</sup>  | 90.42±1.17 <sup>c*</sup>  | 99.95±2.0 <sup>cdf*</sup>  | 134.68±1.29 <sup>dc*</sup> |
| Group G | 38.75±0.74 | 50.29±0.73 <sup>de*</sup>  | 89.86±1.17 <sup>c*</sup>  | 95.56±2.09 <sup>def*</sup> | 128.71±1.29 <sup>df*</sup> |
| Group H | 39.80±0.74 | 49.69±0.73 <sup>de*</sup>  | 88.27±1.17 <sup>c*</sup>  | 96.07±2.09 <sup>cef*</sup> | 125.98±1.29 <sup>ef*</sup> |
| Group I | 39.32±0.74 | 47.07±0.73 <sup>e*</sup>   | 86.17±1.17 <sup>c*</sup>  | 91.78±2.09 <sup>f*</sup>   | 116.91±1.29 <sup>e*</sup>  |

Values are given as mean±SE for 5 rats in each interval in each group (n=20).

Each value not sharing a common letter superscript is significantly different (P<0.05).

\* Mean values differ significantly within the group (P<0.05).

**Table 6: Effect of different treatment protocols on the serum total protein of BDL rats at various time intervals.**

|         | Pre value | 3 <sup>rd</sup> week     | 4 <sup>th</sup> week   | 5 <sup>th</sup> week     | 6 <sup>th</sup> week      |
|---------|-----------|--------------------------|------------------------|--------------------------|---------------------------|
| Group A | 6.4±0.18  | 6.03±0.11 <sup>a*</sup>  | 6.38±0.1 <sup>a*</sup> | 6.21±0.08 <sup>a*</sup>  | 6.4±0.13 <sup>a*</sup>    |
| Group B | 6.38±0.18 | 4.77±0.11 <sup>b*</sup>  | 4.58±0.1 <sup>b*</sup> | 4.36±0.08 <sup>b*</sup>  | 3.33±0.13 <sup>b*</sup>   |
| Group C | 6.29±0.18 | 5.39±0.11 <sup>c*</sup>  | 5.46±0.1 <sup>c*</sup> | 5.38±0.08 <sup>cd*</sup> | 5.38±0.13 <sup>def*</sup> |
| Group D | 6.33±0.18 | 5.5±0.11 <sup>cd*</sup>  | 5.41±0.1 <sup>c*</sup> | 5.02±0.08 <sup>c*</sup>  | 4.62±0.13 <sup>ce*</sup>  |
| Group E | 6.45±0.18 | 5.36±0.11 <sup>c*</sup>  | 5.43±0.1 <sup>c*</sup> | 4.47±0.08 <sup>b*</sup>  | 4.55±0.13 <sup>c*</sup>   |
| Group F | 6.5±0.18  | 5.36±0.11 <sup>c*</sup>  | 5.49±0.1 <sup>c*</sup> | 5.38±0.08 <sup>cd*</sup> | 5.23±0.13 <sup>ef*</sup>  |
| Group G | 6.52±0.18 | 5.53±0.11 <sup>ac*</sup> | 5.63±0.1 <sup>c*</sup> | 5.59±0.08 <sup>de*</sup> | 5.44±0.13 <sup>df*</sup>  |
| Group H | 6.37±0.18 | 5.69±0.11 <sup>ac*</sup> | 5.7±0.1 <sup>c*</sup>  | 5.72±0.08 <sup>de*</sup> | 5.64±0.13 <sup>df*</sup>  |
| Group I | 6.34±0.18 | 5.98±0.11 <sup>ad</sup>  | 5.76±0.1 <sup>c*</sup> | 5.9±0.08 <sup>ae</sup>   | 5.88±0.13 <sup>d</sup>    |

Values are given as mean±SE for 5 rats in each interval in each group (n=20).

Each value not sharing a common letter superscript is significantly different (P<0.05).

\* Mean values differ significantly within the group (P<0.05).

**Table 7: Effect of different treatment protocols on the serum albumin of BDL rats at various time intervals.**

|         | Pre value | 3 <sup>rd</sup> week    | 4 <sup>th</sup> week | 5 <sup>th</sup> week    | 6 <sup>th</sup> week    |
|---------|-----------|-------------------------|----------------------|-------------------------|-------------------------|
| Group A | 4.36±0.24 | 4.4±0.31                | 4.31±0.44            | 4.22±0.39               | 4.37±0.39 <sup>a</sup>  |
| Group B | 4.29±0.24 | 3.31±0.31               | 2.98±0.44            | 2.46±0.39 <sup>a*</sup> | 1.98±0.39 <sup>b*</sup> |
| Group C | 4.64±0.24 | 3.37±0.31 <sup>*</sup>  | 3.89±0.44            | 3.24±0.39 <sup>*</sup>  | 2.81±0.39 <sup>*</sup>  |
| Group D | 4.32±0.24 | 3.43±0.31               | 3.79±0.44            | 3.37±0.39               | 3.21±0.39               |
| Group E | 4.37±0.24 | 2.95±0.31 <sup>a*</sup> | 3.98±0.44            | 3.37±0.39               | 3.08±0.39               |
| Group F | 4.55±0.24 | 3.18±0.31 <sup>*</sup>  | 3.83±0.44            | 3.06±0.39 <sup>*</sup>  | 4.29±0.39 <sup>a</sup>  |
| Group G | 4.53±0.24 | 4.07±0.31               | 3.82±0.44            | 4.53±0.39 <sup>b</sup>  | 3.98±0.39 <sup>a</sup>  |
| Group H | 4.38±0.24 | 4.65±0.31 <sup>b</sup>  | 4.48±0.44            | 3.88±0.39               | 4.08±0.39 <sup>a</sup>  |
| Group I | 4.49±0.24 | 3.05±0.31 <sup>a*</sup> | 3.35±0.44            | 4.09±0.39               | 3.64±0.39               |

Values are given as mean±SE for 5 rats in each interval in each group (n=20).

Each value not sharing a common letter superscript is significantly different (P<0.05).

\* Mean values differ significantly within the group (P<0.05).

**Table 8: Effect of different treatment protocols on the serum globulin of BDL rats at various time intervals.**

|         | Pre value | 3 <sup>rd</sup> week   | 4 <sup>th</sup> week | 5 <sup>th</sup> week | 6 <sup>th</sup> week |
|---------|-----------|------------------------|----------------------|----------------------|----------------------|
| Group A | 2.04±0.29 | 1.64±0.32              | 2.07±0.45            | 1.98±0.38            | 2.04±0.43            |
| Group B | 2.09±0.29 | 1.46±0.32              | 1.59±0.45            | 1.9±0.38             | 1.34±0.43            |
| Group C | 2.02±0.29 | 2.07±0.32              | 1.62±0.45            | 1.65±0.38            | 1.41±0.43            |
| Group D | 2.08±0.29 | 2.41±0.32              | 1.46±0.45            | 1.1±0.38             | 1.47±0.43            |
| Group E | 1.65±0.29 | 2.02±0.32              | 1.57±0.45            | 2.14±0.38            | 2.58±0.43            |
| Group F | 1.94±0.29 | 2.18±0.32              | 1.66±0.45            | 2.33±0.38            | 0.94±0.43            |
| Group G | 1.99±0.29 | 1.46±0.32              | 1.8±0.45             | 1.06±0.38            | 1.46±0.43            |
| Group H | 1.99±0.29 | 1.04±0.32 <sup>a</sup> | 1.22±0.45            | 1.84±0.38            | 1.56±0.43            |
| Group I | 1.85±0.29 | 2.93±0.32 <sup>b</sup> | 2.41±0.45            | 1.81±0.38            | 2.24±0.43            |

Values are given as mean±SE for 5 rats in each interval in each group (n=20).

Each value not sharing a common letter superscript is significantly different (P<0.05).

\* Mean values differ significantly within the group (P<0.05).

**Table 9: Effect of different treatment protocols on the alkaline phosphatase of BDL rats at various time intervals.**

|         | Pre value   | 3 <sup>rd</sup> week        | 4 <sup>th</sup> week     | 5 <sup>th</sup> week        | 6 <sup>th</sup> week      |
|---------|-------------|-----------------------------|--------------------------|-----------------------------|---------------------------|
| Group A | 143.3±6.91  | 149.65±15.02 <sup>a</sup>   | 147.24±5.7 <sup>a</sup>  | 149.77±6.74 <sup>a</sup>    | 151.34±4.98 <sup>a</sup>  |
| Group B | 138.61±6.91 | 235.62±15.02 <sup>b*</sup>  | 253.74±5.7 <sup>b*</sup> | 271.28±6.74 <sup>b*</sup>   | 295.85±4.98 <sup>b*</sup> |
| Group C | 142.52±6.91 | 218.01±15.02 <sup>ab*</sup> | 199.74±5.7 <sup>c*</sup> | 187.41±6.74 <sup>ce*</sup>  | 186.45±4.98 <sup>d*</sup> |
| Group D | 146.81±6.91 | 220.84±15.02 <sup>ab*</sup> | 244.45±5.7 <sup>b*</sup> | 251.41±6.74 <sup>b*</sup>   | 238.48±4.98 <sup>c*</sup> |
| Group E | 143.90±6.91 | 227.36±15.02 <sup>ab*</sup> | 243.57±5.7 <sup>b*</sup> | 219.00±6.74 <sup>bd*</sup>  | 228.25±4.98 <sup>c*</sup> |
| Group F | 141.55±6.91 | 194.64±15.02 <sup>ab*</sup> | 199.95±5.7 <sup>c*</sup> | 193.67±6.74 <sup>cde*</sup> | 176.19±4.98 <sup>d*</sup> |
| Group G | 139.25±6.91 | 205.80±15.02 <sup>ab*</sup> | 199.21±5.7 <sup>c*</sup> | 167.54±6.74 <sup>ae*</sup>  | 171.57±4.98 <sup>d*</sup> |
| Group H | 140.64±6.91 | 160.48±15.02 <sup>a</sup>   | 198.70±5.7 <sup>c*</sup> | 182.53±6.74 <sup>ae*</sup>  | 167.21±4.98 <sup>d*</sup> |
| Group I | 142.09±6.91 | 181.72±15.02 <sup>ab</sup>  | 175.09±5.7 <sup>c*</sup> | 175.37±6.74 <sup>ae*</sup>  | 164.88±4.98 <sup>d*</sup> |

Values are given as mean±SE for 5 rats in each interval in each group (n=20).

Each value not sharing a common letter superscript is significantly different (P<0.05).

\* Mean values differ significantly within the group (P<0.05).

**Table 10: Effect of different treatment protocols on the gamma glutamyl transferase of BDL rats at various time intervals.**

|         | Pre value              | 3 <sup>rd</sup> week      | 4 <sup>th</sup> week      | 5 <sup>th</sup> week      | 6 <sup>th</sup> week       |
|---------|------------------------|---------------------------|---------------------------|---------------------------|----------------------------|
| Group A | 4.49±0.19              | 4.75±0.73 <sup>a</sup>    | 4.5±0.64 <sup>a</sup>     | 4.18±1.83 <sup>a</sup>    | 5.28±1.12 <sup>a</sup>     |
| Group B | 4.29±0.19              | 24.30±0.73 <sup>b*</sup>  | 46.56±0.64 <sup>b*</sup>  | 74.08±1.83 <sup>b*</sup>  | 116.42±1.12 <sup>b*</sup>  |
| Group C | 4.73±0.19              | 19.20±0.73 <sup>c*</sup>  | 38.15±0.64 <sup>d*</sup>  | 59.96±1.83 <sup>cd*</sup> | 104.45±1.12 <sup>cd*</sup> |
| Group D | 4.32±0.19              | 24.19±0.73 <sup>cd*</sup> | 45.77±0.64 <sup>bh*</sup> | 67.4±1.83 <sup>bc*</sup>  | 108.89±1.12 <sup>bc*</sup> |
| Group E | 3.83±0.19 <sup>a</sup> | 22.66±0.73 <sup>c*</sup>  | 42.53±0.64 <sup>ce*</sup> | 67.92±1.83 <sup>bc*</sup> | 111.23±1.12 <sup>b*</sup>  |
| Group F | 4.28±0.19              | 20.82±0.73 <sup>c*</sup>  | 42.71±0.64 <sup>eh*</sup> | 56.33±1.83 <sup>d*</sup>  | 99.06±1.12 <sup>d*</sup>   |
| Group G | 4.8±0.19 <sup>b</sup>  | 17.23±0.73 <sup>ac*</sup> | 34.49±0.64 <sup>f*</sup>  | 49.55±1.83 <sup>e*</sup>  | 82.68±1.12 <sup>e*</sup>   |
| Group H | 4.59±0.19              | 19.73±0.73 <sup>ac*</sup> | 34.33±0.64 <sup>f*</sup>  | 50.73±1.83 <sup>e*</sup>  | 82.34±1.12 <sup>e*</sup>   |
| Group I | 4.26±0.19              | 14.4±0.73 <sup>ad*</sup>  | 25.2±0.64 <sup>g*</sup>   | 36.76±1.83 <sup>f*</sup>  | 72.01±1.12 <sup>f*</sup>   |

Values are given as mean±SE for 5 rats in each interval in each group (n=20).

Each value not sharing a common letter superscript is significantly different (P<0.05).

\* Mean values differ significantly within the group (P<0.05).

**Table 11: Effect of different treatment protocols on the total bilirubin of BDL rats at various time intervals**

|         | Pre value | 3 <sup>rd</sup> week    | 4 <sup>th</sup> week      | 5 <sup>th</sup> week     | 6 <sup>th</sup> week      |
|---------|-----------|-------------------------|---------------------------|--------------------------|---------------------------|
| Group A | 0.43±0.03 | 0.45±0.08 <sup>a</sup>  | 0.41±0.14 <sup>ac</sup>   | 0.41±0.09 <sup>a</sup>   | 0.41±0.12 <sup>a</sup>    |
| Group B | 0.48±0.03 | 1.31±0.08 <sup>b*</sup> | 1.49±0.14 <sup>b*</sup>   | 2.26±0.09 <sup>b*</sup>  | 2.54±0.12 <sup>b*</sup>   |
| Group C | 0.37±0.03 | 0.57±0.08 <sup>a</sup>  | 0.91±0.14 <sup>abc*</sup> | 1.46±0.09 <sup>cd*</sup> | 1.42±0.12 <sup>cd*</sup>  |
| Group D | 0.45±0.03 | 0.74±0.08 <sup>a*</sup> | 1.28±0.14 <sup>a*</sup>   | 1.58±0.09 <sup>c*</sup>  | 1.83±0.12 <sup>c*</sup>   |
| Group E | 0.46±0.03 | 0.76±0.08 <sup>a*</sup> | 0.95±0.14 <sup>ac*</sup>  | 1.04±0.09 <sup>de*</sup> | 1.81±0.12 <sup>c*</sup>   |
| Group F | 0.43±0.03 | 0.53±0.08 <sup>a</sup>  | 1.26±0.14 <sup>abc*</sup> | 1.32±0.09 <sup>cd*</sup> | 1.64±0.12 <sup>c*</sup>   |
| Group G | 0.36±0.03 | 0.55±0.08 <sup>a</sup>  | 1.13±0.14 <sup>abc*</sup> | 1.24±0.09 <sup>cd*</sup> | 1.27±0.12 <sup>cde*</sup> |
| Group H | 0.39±0.03 | 0.4±0.08 <sup>a</sup>   | 0.61±0.14 <sup>abc*</sup> | 1.24±0.09 <sup>cd*</sup> | 1.04±0.12 <sup>de*</sup>  |
| Group I | 0.40±0.03 | 0.42±0.08 <sup>a</sup>  | 0.6±0.14 <sup>c</sup>     | 0.77±0.09 <sup>c*</sup>  | 0.77±0.12 <sup>ae*</sup>  |

Values are given as mean±SE for 5 rats in each interval in each group (n=20).

Each value not sharing a common letter superscript is significantly different (P<0.05).

\* Mean values differ significantly within the group (P<0.05).

**Table 12: Effect of different treatment protocols on the direct bilirubin of BDL rats at various time intervals.**

|         | Pre value | 3 <sup>rd</sup> week   | 4 <sup>th</sup> week     | 5 <sup>th</sup> week   | 6 <sup>th</sup> week    |
|---------|-----------|------------------------|--------------------------|------------------------|-------------------------|
| Group A | 0.17±0.03 | 0.14±0.11              | 0.13±0.11 <sup>a</sup>   | 0.18±0.14              | 0.2±0.12 <sup>a</sup>   |
| Group B | 0.18±0.03 | 0.58±0.11 <sup>*</sup> | 1.1±0.11 <sup>b*</sup>   | 0.85±0.14 <sup>*</sup> | 1.81±0.12 <sup>b*</sup> |
| Group C | 0.22±0.03 | 0.17±0.11              | 0.31±0.11 <sup>a</sup>   | 0.71±0.14              | 0.15±0.12 <sup>a</sup>  |
| Group D | 0.2±0.03  | 0.22±0.11              | 0.66±0.11 <sup>ab*</sup> | 0.35±0.14              | 0.59±0.12 <sup>a*</sup> |
| Group E | 0.29±0.03 | 0.42±0.11              | 0.27±0.11 <sup>a</sup>   | 0.29±0.14              | 0.53±0.12 <sup>a</sup>  |
| Group F | 0.27±0.03 | 0.28±0.11              | 0.22±0.11 <sup>a</sup>   | 0.19±0.14              | 0.24±0.12 <sup>a</sup>  |
| Group G | 0.19±0.03 | 0.20±0.11              | 0.42±0.11 <sup>a</sup>   | 0.41±0.14              | 0.33±0.12 <sup>a</sup>  |
| Group H | 0.28±0.03 | 0.42±0.11              | 0.26±0.11 <sup>a</sup>   | 0.34±0.14              | 0.23±0.12 <sup>a</sup>  |
| Group I | 0.21±0.03 | 0.23±0.11              | 0.26±0.11 <sup>a</sup>   | 0.29±0.14              | 0.28±0.12 <sup>a</sup>  |

Values are given as mean±SE for 5 rats in each interval in each group (n=20).

Each value not sharing a common letter superscript is significantly different (P<0.05).

\* Mean values differ significantly within the group (P<0.05).

**Table 13: Effect of different treatment protocols on the indirect bilirubin of BDL rats at various time intervals.**

|         | Pre value | 3 <sup>rd</sup> week    | 4 <sup>th</sup> week     | 5 <sup>th</sup> week     | 6 <sup>th</sup> week      |
|---------|-----------|-------------------------|--------------------------|--------------------------|---------------------------|
| Group A | 0.26±0.04 | 0.31±0.11 <sup>ab</sup> | 0.28±0.15 <sup>a</sup>   | 0.23±0.19 <sup>c</sup>   | 0.21±0.18 <sup>a</sup>    |
| Group B | 0.3±0.04  | 0.74±0.11 <sup>a*</sup> | 0.38±0.15 <sup>ab</sup>  | 1.41±0.19 <sup>a*</sup>  | 0.73±0.18 <sup>ab</sup>   |
| Group C | 0.15±0.04 | 0.41±0.11 <sup>ab</sup> | 0.59±0.15 <sup>ab*</sup> | 0.75±0.19 <sup>b*</sup>  | 1.27±0.18 <sup>bc*</sup>  |
| Group D | 0.25±0.04 | 0.52±0.11 <sup>a</sup>  | 0.62±0.15 <sup>ab*</sup> | 1.23±0.19 <sup>b*</sup>  | 1.24±0.18 <sup>bc*</sup>  |
| Group E | 0.17±0.04 | 0.34±0.11 <sup>ab</sup> | 0.68±0.15 <sup>ab*</sup> | 0.75±0.19 <sup>b*</sup>  | 1.28±0.18 <sup>bc</sup>   |
| Group F | 0.16±0.04 | 0.25±0.11 <sup>ab</sup> | 1.04±0.15 <sup>ab*</sup> | 1.13±0.19 <sup>b*</sup>  | 1.41±0.18 <sup>b*</sup>   |
| Group G | 0.17±0.04 | 0.35±0.11 <sup>ab</sup> | 0.71±0.15 <sup>b*</sup>  | 0.83±0.19 <sup>bc*</sup> | 0.94±0.18 <sup>abc*</sup> |
| Group H | 0.11±0.04 | 0.14±0.11 <sup>b</sup>  | 0.35±0.15 <sup>ab*</sup> | 0.9±0.19 <sup>bc*</sup>  | 0.82±0.18 <sup>abc*</sup> |
| Group I | 0.19±0.04 | 0.18±0.11 <sup>b</sup>  | 0.34±0.15 <sup>ab*</sup> | 0.47±0.19 <sup>b*</sup>  | 0.49±0.18 <sup>ac*</sup>  |

Values are given as mean±SE for 5 rats in each interval in each group (n=20).

Each value not sharing a common letter superscript is significantly different (P<0.05).

\* Mean values differ significantly within the group (P<0.05).

**Table 14: Effect of different treatment protocols on the total lipids of BDL rats at various time intervals.**

|         | Pre value   | 3 <sup>rd</sup> week      | 4 <sup>th</sup> week       | 5 <sup>th</sup> week       | 6 <sup>th</sup> week     |
|---------|-------------|---------------------------|----------------------------|----------------------------|--------------------------|
| Group A | 155.78±0.55 | 156.23±3.7 <sup>a</sup>   | 157.6±2.98 <sup>a</sup>    | 155.56±6.12 <sup>a</sup>   | 155.75±4.7 <sup>a</sup>  |
| Group B | 156.04±0.55 | 302.91±3.7 <sup>b*</sup>  | 600.86±2.98 <sup>b*</sup>  | 638.16±6.12 <sup>b*</sup>  | 708.83±4.7 <sup>b*</sup> |
| Group C | 156.33±0.55 | 265.74±3.7 <sup>cd*</sup> | 451.6±2.98 <sup>e*</sup>   | 549.53±6.12 <sup>e*</sup>  | 621.53±4.7 <sup>e*</sup> |
| Group D | 154.11±0.55 | 288.15±3.7 <sup>b*</sup>  | 505.35±2.98 <sup>c*</sup>  | 577.87±6.12 <sup>c*</sup>  | 676.27±4.7 <sup>c*</sup> |
| Group E | 156.1±0.55  | 291.42±3.7 <sup>b*</sup>  | 491.62±2.98 <sup>cd*</sup> | 588.61±6.12 <sup>cd*</sup> | 653.6±4.7 <sup>cd*</sup> |
| Group F | 155.65±0.55 | 248.34±3.7 <sup>d*</sup>  | 455.17±2.98 <sup>e*</sup>  | 538.7±6.12 <sup>e*</sup>   | 612.83±4.7 <sup>e*</sup> |
| Group G | 154.26±0.55 | 225.28±3.7 <sup>e*</sup>  | 421.82±2.98 <sup>f*</sup>  | 535.04±6.12 <sup>e*</sup>  | 601.33±4.7 <sup>e*</sup> |
| Group H | 156.26±0.55 | 223.85±3.7 <sup>e*</sup>  | 416.74±2.98 <sup>f*</sup>  | 531.08±6.12 <sup>f*</sup>  | 570.84±4.7 <sup>f*</sup> |
| Group I | 155.66±0.55 | 217.09±3.7 <sup>e*</sup>  | 388.69±2.98 <sup>h*</sup>  | 369.4±6.12 <sup>g*</sup>   | 392.43±4.7 <sup>g*</sup> |

Values are given as mean±SE for 5 rats in each interval in each group (n=20).

Each value not sharing a common letter superscript is significantly different (P<0.05).

\* Mean values differ significantly within the group (P<0.05).

**Table 15: Effect of different treatment protocols on the triglycerides of BDL rats at various time intervals.**

|         | Pre value               | 3 <sup>rd</sup> week        | 4 <sup>th</sup> week     | 5 <sup>th</sup> week      | 6 <sup>th</sup> week     |
|---------|-------------------------|-----------------------------|--------------------------|---------------------------|--------------------------|
| Group A | 73.67±0.41 <sup>a</sup> | 75.16±0.95 <sup>a</sup>     | 74.63±0.44 <sup>a</sup>  | 74.76±0.97 <sup>a</sup>   | 74.89±0.6 <sup>a</sup>   |
| Group B | 74.77±0.41              | 86.16±0.95 <sup>b*</sup>    | 97.96±0.44 <sup>b*</sup> | 101.65±0.97 <sup>b*</sup> | 117.13±0.6 <sup>b*</sup> |
| Group C | 75.48±0.41              | 80.37±0.95 <sup>bde*</sup>  | 91.62±0.44 <sup>d*</sup> | 91.81±0.97 <sup>c*</sup>  | 99.95±0.6 <sup>d*</sup>  |
| Group D | 74.81±0.41              | 81.37±0.95 <sup>bc*</sup>   | 95.15±0.44 <sup>c*</sup> | 93.60±0.97 <sup>c*</sup>  | 109.21±0.6 <sup>c*</sup> |
| Group E | 76±0.41 <sup>b</sup>    | 83.55±0.95 <sup>cdf*</sup>  | 94.97±0.44 <sup>c*</sup> | 95.19±0.97 <sup>c*</sup>  | 106.56±0.6 <sup>c*</sup> |
| Group F | 74.83±0.41              | 83.54±0.95 <sup>bde*</sup>  | 92.67±0.44 <sup>d*</sup> | 93.54±0.97 <sup>c*</sup>  | 99.07±0.6 <sup>d</sup>   |
| Group G | 75.1±0.41               | 79.5±0.95 <sup>acdef*</sup> | 88.72±0.44 <sup>e*</sup> | 91.28±0.97 <sup>cd*</sup> | 98.66±0.6 <sup>d</sup>   |
| Group H | 74.51±0.41              | 80.28±0.95 <sup>cdf*</sup>  | 87.11±0.44 <sup>e*</sup> | 91.23±0.97 <sup>cd*</sup> | 97.55±0.6 <sup>d*</sup>  |
| Group I | 75.81±0.45 <sup>b</sup> | 78.48±1.06 <sup>adf</sup>   | 83.10±0.49 <sup>f*</sup> | 86.38±1.08 <sup>d*</sup>  | 90.34±0.68 <sup>e*</sup> |

Values are given as mean±SE for 5 rats in each interval in each group (n=20).

Each value not sharing a common letter superscript is significantly different (P<0.05).

\* Mean values differ significantly within the group (P<0.05).

**Table 16: Effect of different treatment protocols on the high-density lipoprotein (HDL) of BDL rats at various time intervals.**

|         | Pre value  | 3 <sup>rd</sup> week     | 4 <sup>th</sup> week      | 5 <sup>th</sup> week      | 6 <sup>th</sup> week      |
|---------|------------|--------------------------|---------------------------|---------------------------|---------------------------|
| Group A | 43.54±0.47 | 44.92±0.73 <sup>a</sup>  | 43.65±0.49 <sup>a</sup>   | 43.2±0.41 <sup>a</sup>    | 44.3±0.44 <sup>a</sup>    |
| Group B | 43.92±0.47 | 34.26±0.73 <sup>b*</sup> | 28.18±0.49 <sup>b*</sup>  | 23.66±0.41 <sup>b*</sup>  | 18.59±0.44 <sup>b*</sup>  |
| Group C | 43.38±0.47 | 33.75±0.73 <sup>b*</sup> | 38.14±0.49 <sup>c*</sup>  | 40.19±0.41 <sup>c*</sup>  | 41.47±0.44 <sup>cd*</sup> |
| Group D | 42.36±0.47 | 31.51±0.73 <sup>b*</sup> | 35.88±0.49 <sup>c*</sup>  | 37.64±0.41 <sup>d*</sup>  | 39.66±0.44 <sup>c*</sup>  |
| Group E | 42.38±0.47 | 36.08±0.73 <sup>b*</sup> | 35.93±0.49 <sup>c*</sup>  | 37.10±0.41 <sup>d*</sup>  | 39.77±0.44 <sup>c*</sup>  |
| Group F | 43.16±0.47 | 39.92±0.73 <sup>c*</sup> | 37.5±0.49 <sup>c*</sup>   | 38.61±0.41 <sup>cd*</sup> | 42.11±0.44 <sup>d*</sup>  |
| Group G | 41.96±0.47 | 43.16±0.73 <sup>a</sup>  | 45.62±0.49 <sup>ad*</sup> | 48.15±0.41 <sup>e*</sup>  | 51.92±0.44 <sup>e*</sup>  |
| Group H | 42.05±0.47 | 45.11±0.73 <sup>a*</sup> | 47.23±0.49 <sup>de*</sup> | 48.78±0.41 <sup>e*</sup>  | 52.87±0.44 <sup>e*</sup>  |
| Group I | 42.52±0.47 | 48.39±0.73 <sup>a*</sup> | 48.67±0.49 <sup>c*</sup>  | 53.24±0.41 <sup>f*</sup>  | 59.68±0.44 <sup>f*</sup>  |

Values are given as mean±SE for 5 rats in each interval in each group (n=20).

Each value not sharing a common letter superscript is significantly different (P<0.05).

\* Mean values differ significantly within the group (P<0.05).



**Table 17: Effect of different treatment protocols on the low-density lipoprotein (LDL) of BDL rats at various time intervals.**

|         | Pre value  | 3 <sup>rd</sup> week     | 4 <sup>th</sup> week      | 5 <sup>th</sup> week      | 6 <sup>th</sup> week     |
|---------|------------|--------------------------|---------------------------|---------------------------|--------------------------|
| Group A | 23.61±0.32 | 23.9±0.35 <sup>a</sup>   | 24.45±0.48 <sup>a</sup>   | 24.52±0.59 <sup>a</sup>   | 24.89±0.51 <sup>a</sup>  |
| Group B | 24.11±0.32 | 36.77±0.35 <sup>b*</sup> | 42.96±0.48 <sup>b*</sup>  | 58.62±0.59 <sup>b*</sup>  | 74.53±0.51 <sup>b*</sup> |
| Group C | 24.68±0.32 | 31.45±0.35 <sup>d*</sup> | 40.86±0.48 <sup>bc*</sup> | 55.01±0.59 <sup>c*</sup>  | 66.19±0.51 <sup>d*</sup> |
| Group D | 24.3±0.32  | 34.8±0.35 <sup>c*</sup>  | 42.67±0.48 <sup>b*</sup>  | 56.8±0.59 <sup>bc*</sup>  | 71.51±0.51 <sup>c*</sup> |
| Group E | 24.52±0.32 | 33.8±0.35 <sup>c*</sup>  | 41.06±0.48 <sup>bc*</sup> | 56.56±0.59 <sup>bc*</sup> | 71.67±0.51 <sup>c*</sup> |
| Group F | 24.18±0.32 | 30.9±0.35 <sup>d*</sup>  | 38.87±0.48 <sup>cd*</sup> | 51.11±0.59 <sup>d*</sup>  | 62.67±0.51 <sup>e*</sup> |
| Group G | 24.64±0.32 | 30.13±0.35 <sup>d*</sup> | 40.1±0.48 <sup>cd*</sup>  | 47.37±0.59 <sup>e*</sup>  | 48.81±0.51 <sup>f*</sup> |
| Group H | 24.92±0.32 | 30.5±0.35 <sup>d*</sup>  | 38.31±0.48 <sup>d*</sup>  | 47.99±0.59 <sup>e*</sup>  | 48.21±0.51 <sup>f*</sup> |
| Group I | 24.72±0.32 | 27.67±0.35 <sup>e*</sup> | 31.04±0.48 <sup>e*</sup>  | 37.91±0.59 <sup>f*</sup>  | 40.42±0.51 <sup>g*</sup> |

Values are given as mean±SE for 5 rats in each interval in each group (n=20).

Each value not sharing a common letter superscript is significantly different (P<0.05).

\* Mean values differ significantly within the group (P<0.05).

**Table 18: Effect of different treatment protocols on the total cholesterol of BDL rats at various time intervals**

|         | Pre value  | 3 <sup>rd</sup> week      | 4 <sup>th</sup> week      | 5 <sup>th</sup> week      | 6 <sup>th</sup> week      |
|---------|------------|---------------------------|---------------------------|---------------------------|---------------------------|
| Group A | 53.62±0.46 | 53.60±0.71 <sup>a</sup>   | 53.13±0.49 <sup>a</sup>   | 52.69±0.43 <sup>a</sup>   | 53.79±0.44 <sup>a</sup>   |
| Group B | 53.40±0.46 | 88.56±0.71 <sup>b*</sup>  | 95.49±0.49 <sup>b*</sup>  | 101.96±0.43 <sup>b*</sup> | 117.69±0.44 <sup>b*</sup> |
| Group C | 52.86±0.46 | 76.84±0.71 <sup>c*</sup>  | 80.48±0.49 <sup>c*</sup>  | 74.29±0.43 <sup>ce*</sup> | 72.45±0.44 <sup>ce*</sup> |
| Group D | 52.25±0.46 | 79.56±0.71 <sup>ce*</sup> | 82.93±0.49 <sup>d*</sup>  | 76.73±0.43 <sup>d*</sup>  | 76.65±0.44 <sup>d*</sup>  |
| Group E | 51.87±0.46 | 84.13±0.71 <sup>d*</sup>  | 77.39±0.49 <sup>ce*</sup> | 76.19±0.43 <sup>cd*</sup> | 76.76±0.44 <sup>d*</sup>  |
| Group F | 52.65±0.46 | 83.01±0.71 <sup>de*</sup> | 78.9±0.49 <sup>ce*</sup>  | 72.71±0.43 <sup>eg*</sup> | 73.10±0.44 <sup>e*</sup>  |
| Group G | 51.44±0.46 | 70.57±0.71 <sup>f*</sup>  | 69.72±0.49 <sup>fg*</sup> | 70.24±0.43 <sup>f*</sup>  | 64.10±0.44 <sup>f*</sup>  |
| Group H | 51.53±0.46 | 72.51±0.71 <sup>f*</sup>  | 71.33±0.49 <sup>f</sup>   | 70.87±0.43 <sup>fg*</sup> | 65.05±0.44 <sup>f</sup>   |
| Group I | 52.00±0.46 | 70.59±0.71 <sup>f*</sup>  | 67.99±0.49 <sup>g*</sup>  | 65.74±0.43 <sup>h*</sup>  | 61.88±0.44 <sup>h*</sup>  |

Values are given as mean±SE for 5 rats in each interval in each group (n=20).

Each value not sharing a common letter superscript is significantly different (P<0.05).

\* Mean values differ significantly within the group (P<0.05).

**Table 19: Effect of different treatment protocols on the serum creatinine of BDL rats at various time intervals.**

|         | Pre value | 3 <sup>rd</sup> week    | 4 <sup>th</sup> week    | 5 <sup>th</sup> week    | 6 <sup>th</sup> week    |
|---------|-----------|-------------------------|-------------------------|-------------------------|-------------------------|
| Group A | 1.26±0.03 | 1.28±0.04 <sup>ab</sup> | 1.28±0.03 <sup>a</sup>  | 1.21±0.07 <sup>a</sup>  | 1.27±0.09 <sup>a</sup>  |
| Group B | 1.24±0.03 | 1.43±0.04 <sup>a</sup>  | 1.60±0.03 <sup>b*</sup> | 1.86±0.07 <sup>b*</sup> | 2.77±0.09 <sup>b*</sup> |
| Group C | 1.23±0.03 | 1.27±0.04 <sup>ab</sup> | 1.28±0.03 <sup>a*</sup> | 1.38±0.07 <sup>a*</sup> | 1.33±0.09 <sup>a*</sup> |
| Group D | 1.29±0.03 | 1.28±0.04 <sup>ab</sup> | 1.39±0.03 <sup>a</sup>  | 1.46±0.07 <sup>a</sup>  | 1.42±0.09 <sup>a</sup>  |
| Group E | 1.28±0.03 | 1.29±0.04 <sup>ab</sup> | 1.27±0.03 <sup>a</sup>  | 1.45±0.07 <sup>a</sup>  | 1.44±0.09 <sup>a</sup>  |
| Group F | 1.29±0.03 | 1.24±0.04 <sup>b</sup>  | 1.33±0.03 <sup>a</sup>  | 1.34±0.07 <sup>a</sup>  | 1.40±0.09 <sup>a</sup>  |
| Group G | 1.30±0.03 | 1.19±0.04 <sup>b</sup>  | 1.28±0.03 <sup>a</sup>  | 1.32±0.07 <sup>a</sup>  | 1.31±0.09 <sup>a</sup>  |
| Group H | 1.25±0.03 | 1.17±0.04 <sup>b</sup>  | 1.33±0.03 <sup>a</sup>  | 1.38±0.07 <sup>a</sup>  | 1.30±0.09 <sup>a</sup>  |
| Group I | 1.27±0.03 | 1.15±0.04 <sup>b</sup>  | 1.39±0.03 <sup>a*</sup> | 1.35±0.07 <sup>a*</sup> | 1.25±0.09 <sup>a</sup>  |

Values are given as mean±SE for 5 rats in each interval in each group (n=20).

Each value not sharing a common letter superscript is significantly different (P<0.05).

\* Mean values differ significantly within the group (P<0.05).

**Table 20: Effect of different treatment protocols on the serum urea of BDL rats at various time intervals.**

|         | Pre value  | 3 <sup>rd</sup> week       | 4 <sup>th</sup> week        | 5 <sup>th</sup> week        | 6 <sup>th</sup> week      |
|---------|------------|----------------------------|-----------------------------|-----------------------------|---------------------------|
| Group A | 19.3±0.32  | 19.25±0.39 <sup>a</sup>    | 19.97±0.54 <sup>ac</sup>    | 19.96±0.41 <sup>a</sup>     | 20.62±0.3 <sup>a</sup>    |
| Group B | 20.1±0.32  | 23.28±0.39 <sup>b**</sup>  | 27.2±0.54 <sup>b**</sup>    | 30.52±0.41 <sup>b**</sup>   | 30.87±0.3 <sup>b**</sup>  |
| Group C | 20.41±0.32 | 21.36±0.39 <sup>bc**</sup> | 23.61±0.54 <sup>b**</sup>   | 27.83±0.41 <sup>b**</sup>   | 29.02±0.3 <sup>b**</sup>  |
| Group D | 20±0.32    | 23.2±0.39 <sup>bc**</sup>  | 27.21±0.54 <sup>bd**</sup>  | 31.09±0.41 <sup>bc**</sup>  | 30.91±0.3 <sup>bc**</sup> |
| Group E | 20.07±0.32 | 22.69±0.39 <sup>c</sup>    | 24.86±0.54 <sup>cde**</sup> | 30.06±0.41 <sup>cd**</sup>  | 29.72±0.3 <sup>ce**</sup> |
| Group F | 20.46±0.32 | 22.84±0.39 <sup>bc**</sup> | 24.75±0.54 <sup>bcd**</sup> | 29.45±0.41 <sup>bc**</sup>  | 30.23±0.3 <sup>bc**</sup> |
| Group G | 19.81±0.32 | 21.63±0.39 <sup>bc**</sup> | 23.48±0.54 <sup>de**</sup>  | 26.89±0.41 <sup>d**</sup>   | 26.41±0.3 <sup>d**</sup>  |
| Group H | 20.06±0.32 | 21.71±0.39 <sup>bc**</sup> | 23.46±0.54 <sup>de**</sup>  | 28.18±0.41 <sup>cde**</sup> | 28.13±0.3 <sup>e**</sup>  |
| Group I | 20.06±0.32 | 21.46±0.39 <sup>bc</sup>   | 22.02±0.54 <sup>e*</sup>    | 22.8±0.41 <sup>f**</sup>    | 24.66±0.3 <sup>f**</sup>  |

Values are given as mean±SE for 5 rats in each interval in each group (n=20).

Each value not sharing a common letter superscript is significantly different (P<0.05).

\* Mean values differ significantly within the group (P<0.05).

**Table 21: Effect of different treatment protocols on the blood urea nitrogen (BUN) of BDL rats at various time intervals.**

Values are given as mean±SE for 5 rats in each interval in each group (n=20).

|         | Pre value                 | 3 <sup>rd</sup> week       | 4 <sup>th</sup> week     | 5 <sup>th</sup> week      | 6 <sup>th</sup> week      |
|---------|---------------------------|----------------------------|--------------------------|---------------------------|---------------------------|
| Group A | 38.39±0.79 <sup>ac</sup>  | 42.57±0.82 <sup>ad*</sup>  | 40.96±0.65 <sup>a</sup>  | 40.7±0.87 <sup>a</sup>    | 41.28±1.15 <sup>a</sup>   |
| Group B | 44.02±0.79 <sup>b</sup>   | 40.12±0.82 <sup>ad*</sup>  | 35.83±0.65 <sup>b</sup>  | 35.92±0.87 <sup>b*</sup>  | 30.36±1.15 <sup>b*</sup>  |
| Group C | 41.27±0.79 <sup>ab</sup>  | 41.48±0.82 <sup>ab</sup>   | 41.87±0.65 <sup>a</sup>  | 44.09±0.87 <sup>a*</sup>  | 45.51±1.15 <sup>a</sup>   |
| Group D | 40.54±0.79 <sup>abc</sup> | 38.75±0.82 <sup>a</sup>    | 42.27±0.65 <sup>a</sup>  | 41.47±0.87 <sup>a</sup>   | 40.52±1.15 <sup>a</sup>   |
| Group E | 39.14±0.79 <sup>ac</sup>  | 42.97±0.82 <sup>bc*</sup>  | 48.62±0.65 <sup>c*</sup> | 52.71±0.87 <sup>c*</sup>  | 51.36±1.15 <sup>c*</sup>  |
| Group F | 38.68±0.79 <sup>abc</sup> | 46.81±0.82 <sup>c*</sup>   | 48.95±0.65 <sup>c*</sup> | 54.67±0.87 <sup>cd*</sup> | 53.47±1.15 <sup>cd*</sup> |
| Group G | 37.3±0.79 <sup>c</sup>    | 41.8±0.82 <sup>ab*</sup>   | 48.39±0.65 <sup>c*</sup> | 57.74±0.87 <sup>de*</sup> | 55.23±1.15 <sup>cd*</sup> |
| Group H | 38.31±0.79 <sup>ac</sup>  | 43.29±0.82 <sup>bcd*</sup> | 54.28±0.65 <sup>d*</sup> | 60.55±0.87 <sup>e*</sup>  | 57.38±1.15 <sup>de*</sup> |
| Group I | 38.54±0.79 <sup>ac</sup>  | 44.4±0.82 <sup>bc*</sup>   | 54.8±0.65 <sup>d*</sup>  | 61.38±0.87 <sup>c*</sup>  | 62.66±1.15 <sup>e*</sup>  |

Each value not sharing a common letter superscript is significantly different (P<0.05).

\* Mean values differ significantly within the group (P<0.05).

**Table 22: Effect of different treatment protocols on the serum hepatocyte growth factor level of BDL rats at various time intervals.**

|         | Pre value | 3 <sup>rd</sup> week     | 4 <sup>th</sup> week      | 5 <sup>th</sup> week      | 6 <sup>th</sup> week      |
|---------|-----------|--------------------------|---------------------------|---------------------------|---------------------------|
| Group A | 9.6±0.46  | 9.58±0.52 <sup>a</sup>   | 9.11±0.35 <sup>a</sup>    | 8.67±0.35 <sup>a</sup>    | 9.77±0.36 <sup>a</sup>    |
| Group B | 9.38±0.46 | 15.49±0.52 <sup>b*</sup> | 17.69±0.35 <sup>b*</sup>  | 20.89±0.35 <sup>b**</sup> | 27.21±0.36 <sup>b*</sup>  |
| Group C | 8.84±0.46 | 9.88±0.52 <sup>a</sup>   | 11.08±0.35 <sup>ac*</sup> | 13.18±0.35 <sup>ce*</sup> | 15.22±0.36 <sup>ce*</sup> |
| Group D | 8.23±0.46 | 9.77±0.52 <sup>a*</sup>  | 12.87±0.35 <sup>d*</sup>  | 14.97±0.35 <sup>d*</sup>  | 17.00±0.36 <sup>d*</sup>  |
| Group E | 7.85±0.46 | 9.39±0.52 <sup>a*</sup>  | 12.49±0.35 <sup>d*</sup>  | 14.58±0.35 <sup>cd*</sup> | 16.62±0.36 <sup>cd*</sup> |
| Group F | 8.63±0.46 | 9.67±0.52 <sup>a</sup>   | 10.87±0.35 <sup>ac*</sup> | 12.59±0.35 <sup>e*</sup>  | 14.62±0.36 <sup>e*</sup>  |
| Group G | 7.42±0.46 | 8.18±0.52 <sup>a</sup>   | 10.28±0.35 <sup>a**</sup> | 11.53±0.35 <sup>ac*</sup> | 13.63±0.36 <sup>eg*</sup> |
| Group H | 7.52±0.46 | 8.73±0.52 <sup>a</sup>   | 10.34±0.35 <sup>a*</sup>  | 11.60±0.35 <sup>ac*</sup> | 13.70±0.36 <sup>eg*</sup> |
| Group I | 7.98±0.46 | 8.25±0.52 <sup>a</sup>   | 9.37±0.35 <sup>a*</sup>   | 10.2±0.35 <sup>a*</sup>   | 12.30±0.36 <sup>g*</sup>  |

Values are given as mean±SE for 5 rats in each interval in each group (n=20).

Each value not sharing a common letter superscript is significantly different (P<0.05).

\* Mean values differ significantly within the group (P<0.05).

**Table 23: Effect of different treatment protocols on the MMP-2 of BDL rats at various time intervals.**

|         | Pre value | 3rd week                 | 4th week                  | 5th week                   | 6th week                   |
|---------|-----------|--------------------------|---------------------------|----------------------------|----------------------------|
| Group A | 6.83±0.16 | 6.76±1.92 <sup>a</sup>   | 7.67±2.71 <sup>a</sup>    | 8.34±3.08 <sup>a</sup>     | 9.48±3.43 <sup>a</sup>     |
| Group B | 6.72±0.16 | 80.75±1.92 <sup>b*</sup> | 75.8±2.71 <sup>b*</sup>   | 84.05±3.08 <sup>b*</sup>   | 125.11±3.43 <sup>b*</sup>  |
| Group C | 6.89±0.16 | 80.17±1.92 <sup>b*</sup> | 94.37±2.71 <sup>cd*</sup> | 129.69±3.08 <sup>cd*</sup> | 185.22±3.43 <sup>b*</sup>  |
| Group D | 7.2±0.16  | 78.95±1.92 <sup>b*</sup> | 91.28±2.71 <sup>cd*</sup> | 122.38±3.08 <sup>c*</sup>  | 183.76±3.43 <sup>cd*</sup> |
| Group E | 6.93±0.16 | 79.97±1.92 <sup>b*</sup> | 82.58±2.71 <sup>bc*</sup> | 129.63±3.08 <sup>cd*</sup> | 175.87±3.43 <sup>cd*</sup> |
| Group F | 6.86±0.16 | 82.46±1.92 <sup>b*</sup> | 96.84±2.71 <sup>d*</sup>  | 127.65±3.08 <sup>cd*</sup> | 185.88±3.43 <sup>c*</sup>  |
| Group G | 7.32±0.16 | 82.58±1.92 <sup>b*</sup> | 96.68±2.71 <sup>d*</sup>  | 133.17±3.08 <sup>cd*</sup> | 189.61±3.43 <sup>cd*</sup> |
| Group H | 7.63±0.16 | 83.58±1.92 <sup>b*</sup> | 101.94±2.71 <sup>d*</sup> | 141.62±3.08 <sup>de*</sup> | 189.73±3.43 <sup>cd*</sup> |
| Group I | 6.85±0.16 | 88.19±1.92 <sup>b*</sup> | 116.28±2.71 <sup>e*</sup> | 156.43±3.08 <sup>e*</sup>  | 195.22±3.43 <sup>d*</sup>  |

Values are given as mean±SE for 5 rats in each interval in each group (n=20).

Each value not sharing a common letter superscript is significantly different (P<0.05).

\* Mean values differ significantly within the group (P<0.05).

**Table 24: Effect of different treatment protocols on the TIMP-2 of BDL rats at various time intervals.**

|         | Pre value              | 3rd week                   | 4th week                  | 5th week                  | 6th week                  |
|---------|------------------------|----------------------------|---------------------------|---------------------------|---------------------------|
| Group A | 4.53±0.16 <sup>a</sup> | 4.45±0.42 <sup>a</sup>     | 5.36±0.77 <sup>a</sup>    | 6.03±1.07 <sup>a</sup>    | 7.18±2.09 <sup>a</sup>    |
| Group B | 4.41±0.16 <sup>b</sup> | 13.45±0.42 <sup>b*</sup>   | 21.44±0.77 <sup>b*</sup>  | 37.75±1.07 <sup>b*</sup>  | 78.8±2.09 <sup>b*</sup>   |
| Group C | 4.58±0.16              | 10.91±0.42 <sup>cc*</sup>  | 17.51±0.77 <sup>c*</sup>  | 23.68±1.07 <sup>cd*</sup> | 42.77±2.09 <sup>c*</sup>  |
| Group D | 4.89±0.16              | 11.64±0.42 <sup>bcd*</sup> | 19.44±0.77 <sup>bc*</sup> | 26.12±1.07 <sup>c*</sup>  | 41.5±2.09 <sup>c*</sup>   |
| Group E | 4.63±0.16              | 12.66±0.42 <sup>bc*</sup>  | 18.93±0.77 <sup>bc*</sup> | 25.83±1.07 <sup>c*</sup>  | 46.14±2.09 <sup>c*</sup>  |
| Group F | 4.56±0.16              | 11.3±0.42 <sup>cd*</sup>   | 18.66±0.77 <sup>c*</sup>  | 23.65±1.07 <sup>cd*</sup> | 42.14±2.09 <sup>c*</sup>  |
| Group G | 5.02±0.16              | 10.07±0.42 <sup>d*</sup>   | 18.2±0.77 <sup>bc*</sup>  | 23.55±1.07 <sup>cd*</sup> | 38.7±2.09 <sup>c*</sup>   |
| Group H | 5.33±0.16 <sup>b</sup> | 10.63±0.42 <sup>cd*</sup>  | 18.65±0.77 <sup>bc*</sup> | 24.05±1.07 <sup>cd*</sup> | 35.94±2.09 <sup>cd*</sup> |
| Group I | 4.54±0.16 <sup>a</sup> | 9.15±0.42 <sup>ef*</sup>   | 13.4±0.77 <sup>d*</sup>   | 19.52±1.07 <sup>d*</sup>  | 27.73±2.09 <sup>d*</sup>  |

Values are given as mean±SE for 5 rats in each interval in each group (n=20).

Each value not sharing a common letter superscript is significantly different (P<0.05).

\* Mean values differ significantly within the group (P<0.05).

**Table 25: Effect of different treatment protocols on the total antioxidant capacity (TAC) of BDL rats at various time intervals.**

|         | Pre value  | 3rd week                 | 4th week                  | 5th week                 | 6th week                 |
|---------|------------|--------------------------|---------------------------|--------------------------|--------------------------|
| Group A | 14.67±1.48 | 15.41±2.1 <sup>a</sup>   | 8.07±1.61 <sup>a</sup>    | 13.15±1.08 <sup>a</sup>  | 12.49±1.4 <sup>a</sup>   |
| Group B | 12.51±1.48 | 45.56±2.1 <sup>b*</sup>  | 51.31±1.61 <sup>b*</sup>  | 45.56±1.08 <sup>b*</sup> | 40.21±1.4 <sup>b*</sup>  |
| Group C | 10.25±1.48 | 50.64±2.1 <sup>b*</sup>  | 50.05±1.61 <sup>b*</sup>  | 63.91±1.08 <sup>c*</sup> | 66.96±1.4 <sup>c*</sup>  |
| Group D | 11.91±1.48 | 49.46±2.1 <sup>b*</sup>  | 54.38±1.61 <sup>bd*</sup> | 64.84±1.08 <sup>c*</sup> | 64.93±1.4 <sup>c*</sup>  |
| Group E | 13.36±1.48 | 53.93±2.1 <sup>bc*</sup> | 64.06±1.61 <sup>c*</sup>  | 67.00±1.08 <sup>c*</sup> | 69.82±1.4 <sup>c*</sup>  |
| Group F | 13.72±1.48 | 56.35±2.1 <sup>bc*</sup> | 61.33±1.61 <sup>cd*</sup> | 65.89±1.08 <sup>c*</sup> | 71.09±1.4 <sup>c*</sup>  |
| Group G | 9.5±1.48   | 61.46±2.1 <sup>c*</sup>  | 76.5±1.61 <sup>e*</sup>   | 84.5±1.08 <sup>d*</sup>  | 86.09±1.4 <sup>d*</sup>  |
| Group H | 10.99±1.48 | 61.66±2.1 <sup>c*</sup>  | 79.81±1.61 <sup>ef*</sup> | 94.66±1.08 <sup>e*</sup> | 89.01±1.4 <sup>e*</sup>  |
| Group I | 11.48±1.48 | 63.45±2.1 <sup>c*</sup>  | 87.16±1.61 <sup>f*</sup>  | 99.14±1.08 <sup>e*</sup> | 112.43±1.4 <sup>e*</sup> |

Values are given as mean±SE for 5 rats in each interval in each group (n=20).

Each value not sharing a common letter superscript is significantly different (P<0.05).

\* Mean values differ significantly within the group (P<0.05).

**Table 26: Effect of different treatment protocols on the superoxide dismutase (SOD) of BDL rats at various time intervals.**

|         | Pre value  | 3rd week                 | 4th week                | 5th week                | 6th week               |
|---------|------------|--------------------------|-------------------------|-------------------------|------------------------|
| Group A | 10.67±1.48 | 11.41±2.1 <sup>a</sup>   | 04.07±1.61 <sup>a</sup> | 9.15±1.08 <sup>a</sup>  | 8.49±1.4 <sup>a</sup>  |
| Group B | 9.51±1.48  | 22.06±2.1 <sup>b</sup>   | 27.81±1.61 <sup>b</sup> | 22.06±1.08 <sup>b</sup> | 16.71±1.4 <sup>b</sup> |
| Group C | 7.25±1.48  | 27.14±2.1 <sup>bc</sup>  | 26.55±1.61 <sup>b</sup> | 40.41±1.08 <sup>c</sup> | 43.46±1.4 <sup>c</sup> |
| Group D | 8.91±1.48  | 25.96±2.1 <sup>bc</sup>  | 30.88±1.61 <sup>b</sup> | 41.34±1.08 <sup>c</sup> | 41.43±1.4 <sup>c</sup> |
| Group E | 10.36±1.48 | 30.43±2.1 <sup>bcd</sup> | 40.56±1.61 <sup>c</sup> | 43.5±1.08 <sup>c</sup>  | 46.32±1.4 <sup>c</sup> |
| Group F | 10.72±1.48 | 32.85±2.1 <sup>cd</sup>  | 37.83±1.61 <sup>c</sup> | 42.39±1.08 <sup>c</sup> | 47.59±1.4 <sup>c</sup> |
| Group G | 6.50±1.48  | 37.96±2.1 <sup>d</sup>   | 53.00±1.61 <sup>d</sup> | 61.00±1.08 <sup>d</sup> | 62.59±1.4 <sup>d</sup> |
| Group H | 7.99±1.48  | 38.16±2.1 <sup>d</sup>   | 56.31±1.61 <sup>e</sup> | 71.16±1.08 <sup>e</sup> | 65.51±1.4 <sup>e</sup> |
| Group I | 8.48±1.48  | 39.95±2.1 <sup>d</sup>   | 63.66±1.61 <sup>f</sup> | 75.64±1.08 <sup>e</sup> | 88.93±1.4 <sup>e</sup> |

Values are given as mean±SE for 5 rats in each interval in each group (n=20).

Each value not sharing a common letter superscript is significantly different (P<0.05).

\* Mean values differ significantly within the group (P<0.05).

**Table 27: Effect of different treatment protocols on the percentage of fibrosis of BDL rats at various time intervals.**

|         | <b>4<sup>th</sup> week</b> | <b>6<sup>th</sup> week</b> | <b>Reduction percentage at 4<sup>th</sup> week (%)</b> | <b>Reduction percentage at 6<sup>th</sup> week (%)</b> |
|---------|----------------------------|----------------------------|--------------------------------------------------------|--------------------------------------------------------|
| Group A | 1.39±0.39 <sup>a</sup>     | 4.21±0.53 <sup>a</sup>     |                                                        |                                                        |
| Group B | 9.9±0.39 <sup>b*</sup>     | 32.43±0.53 <sup>b*</sup>   |                                                        |                                                        |
| Group C | 2.55±0.39 <sup>ac*</sup>   | 14.96±0.53 <sup>c*</sup>   | 74.74                                                  | 53.86                                                  |
| Group D | 4.42±0.39 <sup>c*</sup>    | 23.86±0.53 <sup>d*</sup>   | 55.35                                                  | 26.86                                                  |
| Group E | 3.82±0.39 <sup>cde*</sup>  | 24.16±0.53 <sup>d*</sup>   | 61.41                                                  | 25.50                                                  |
| Group F | 2.35±0.39 <sup>ad*</sup>   | 13.26±0.53 <sup>c*</sup>   | 76.26                                                  | 59.42                                                  |
| Group G | 2.05±0.39 <sup>ac*</sup>   | 9.68±0.53 <sup>e*</sup>    | 79.29                                                  | 70.15                                                  |
| Group H | 1.71±0.39 <sup>a*</sup>    | 8.68±0.53 <sup>ef*</sup>   | 82.72                                                  | 73.23                                                  |
| Group I | 1.91±0.39 <sup>a*</sup>    | 6.58±0.53 <sup>f*</sup>    | 80.70                                                  | 79.71                                                  |

Values are given as mean±SE for 5 rats in each interval in each group (n=20).

Each value not sharing a common letter superscript is significantly different (P<0.05).

\* Mean values differ significantly within the group (P<0.05).

**Table 28: Effects of different treatment protocol on necro-inflammatory and fibrosis scores (mean±SD) in the BDL rats.**

| Score        | HAI score            |                        |                        |                        | Knodell score         |                       |                        |                        | METAVIR score        |                       |                        |                       |
|--------------|----------------------|------------------------|------------------------|------------------------|-----------------------|-----------------------|------------------------|------------------------|----------------------|-----------------------|------------------------|-----------------------|
| Groups weeks | 3                    | 4                      | 5                      | 6                      | 3                     | 4                     | 5                      | 6                      | 3                    | 4                     | 5                      | 6                     |
| Group A      | 0.2±0.4 <sup>a</sup> | 0.4±0.5 <sup>a</sup>   | 0.0±0.0 <sup>a</sup>   | 0.2±0.4 <sup>a</sup>   | 0.0±0.0 <sup>a</sup>  | 0.0±0.0 <sup>a</sup>  | 0.0±0.0 <sup>a</sup>   | 0.0±0.0 <sup>a</sup>   | 0.0±0.0 <sup>a</sup> | 0.0±0.0 <sup>a</sup>  | 0.0±0.0 <sup>a</sup>   | 0.0±0.0 <sup>a</sup>  |
| Group B      | 6.8±0.8 <sup>b</sup> | 8.6±0.5 <sup>b</sup>   | 10.8±0.8 <sup>b*</sup> | 12.4±0.5 <sup>b*</sup> | 1.0±0.0 <sup>b</sup>  | 2.2±1.0 <sup>b</sup>  | 2.6±0.8 <sup>b*</sup>  | 3.8±0.4 <sup>b*</sup>  | 1.0±0.0 <sup>b</sup> | 1.8±0.4 <sup>b*</sup> | 2.8±0.4 <sup>b*</sup>  | 3.8±0.4 <sup>b*</sup> |
| Group C      | 4.2±0.8 <sup>c</sup> | 5.6±0.5 <sup>ce</sup>  | 7.0±0.7 <sup>cg*</sup> | 7.6±0.5 <sup>c*</sup>  | 0.8±0.4 <sup>b</sup>  | 0.8±0.4 <sup>c</sup>  | 1.2±1.0 <sup>bc</sup>  | 1.8±1.0 <sup>bce</sup> | 0.8±0.4 <sup>b</sup> | 1.4±0.5 <sup>b</sup>  | 1.4±0.5 <sup>b</sup>   | 1.8±0.8 <sup>cd</sup> |
| Group D      | 5.0±1.5 <sup>c</sup> | 6.4±0.8 <sup>c</sup>   | 9.4±0.5 <sup>d*</sup>  | 9.8±0.4 <sup>d*</sup>  | 1.0±0.0 <sup>b</sup>  | 2.2±1.0 <sup>b</sup>  | 2.2±1.0 <sup>b</sup>   | 2.4±1.3 <sup>bc</sup>  | 1.0±0.0 <sup>b</sup> | 2.0±1.0 <sup>b</sup>  | 1.8±0.8 <sup>c</sup>   | 2.0±1.0 <sup>cd</sup> |
| Group E      | 5.0±1.2 <sup>c</sup> | 6.6±1.1 <sup>c</sup>   | 9.4±0.5 <sup>d*</sup>  | 9.8±0.4 <sup>d*</sup>  | 1.0±0.0 <sup>b</sup>  | 2.6±0.8 <sup>bd</sup> | 2.6±0.8 <sup>b*</sup>  | 2.2±1.0 <sup>c</sup>   | 1.2±0.4 <sup>b</sup> | 2.2±0.8 <sup>b</sup>  | 2.6±0.8 <sup>bc</sup>  | 2.4±0.8 <sup>c</sup>  |
| Group F      | 3.8±0.8 <sup>c</sup> | 6.0±0.7 <sup>cf</sup>  | 7.4±0.5 <sup>c*</sup>  | 8.0±0.7 <sup>c*</sup>  | 0.8±0.4 <sup>b</sup>  | 1.0±0.0 <sup>bc</sup> | 1.4±0.8 <sup>bd</sup>  | 1.8±1.0 <sup>cd</sup>  | 0.6±0.5 <sup>b</sup> | 1.4±0.5 <sup>b</sup>  | 1.4±0.8 <sup>bd</sup>  | 1.6±0.8 <sup>cd</sup> |
| Group G      | 4.4±0.5 <sup>c</sup> | 4.4±0.5 <sup>d</sup>   | 6.2±0.8 <sup>cg*</sup> | 6.4±0.5 <sup>c*</sup>  | 0.6±0.5 <sup>b</sup>  | 0.8±0.4 <sup>ec</sup> | 1.0±0.0 <sup>cd</sup>  | 1.4±0.8 <sup>cd</sup>  | 0.6±0.5 <sup>b</sup> | 0.8±0.4 <sup>b</sup>  | 1.2±0.4 <sup>cde</sup> | 1.6±0.8 <sup>cd</sup> |
| Group H      | 4.2±0.8 <sup>c</sup> | 5.0±0.7 <sup>edf</sup> | 5.4±0.5 <sup>c</sup>   | 6.6±0.5 <sup>c*</sup>  | 0.6±0.5 <sup>b</sup>  | 0.8±0.4 <sup>ce</sup> | 0.8±0.4 <sup>cde</sup> | 1.4±0.8 <sup>cd</sup>  | 0.6±0.5 <sup>b</sup> | 1.0±0.7 <sup>b</sup>  | 1.0±0.0 <sup>ce</sup>  | 1.4±0.5 <sup>cd</sup> |
| Group I      | 4.2±0.4 <sup>c</sup> | 4.4±0.5 <sup>d</sup>   | 4.0±0.7 <sup>f</sup>   | 3.8±0.4 <sup>f</sup>   | 0.4±0.5 <sup>ab</sup> | 0.4±0.5 <sup>ac</sup> | 0.2±0.4 <sup>ae</sup>  | 0.8±0.4 <sup>d</sup>   | 0.6±0.5 <sup>b</sup> | 0.6±0.8 <sup>b</sup>  | 0.6±0.5 <sup>de</sup>  | 1.0±0.7 <sup>d</sup>  |
